# Supplementary material for: Maintenance of Sperm Variation in a Highly Promiscuous Wild Bird
Source: PLOS journal article supplement (doi:10.1371/journal.pone.0028809), 2011-12-15
Supplement: S5 (10.1371/journal.pone.0028809.s005) [file journal.pone.0028809.s005]

**Table S2.** Repeatability of the measurements and of the mean based on the LMM.REML method for Gaussian data ([27]; R package rptR). Coefficients of variation, CV, for sperm traits were calculated as follows: (i) intermale CV using n=46 males with at least 5 sperm each ([28]), and (ii) intramale CV using n=10 males with 50 sperm each ([29]).

|                                   | Repeatability of the measurement |           |         | Repeatability of the mean | Intermale CV | Intramale CV |
|-----------------------------------|----------------------------------|-----------|---------|---------------------------|--------------|--------------|
|                                   | R                                | C.I.      | p       | r                         |              |              |
| <b>Head Length</b>                | 0.68                             | 0.57-0.75 | <0.0001 | 0.94                      | 4.1          | 2.3          |
| <b>Flagellum Length</b>           | 0.65                             | 0.53-0.73 | <0.001  | 0.93                      | 2.3          | 1.4          |
| <b>(Straight) Midpiece Length</b> | 0.54                             | 0.41-0.64 | <0.0001 | 0.90                      | 3.5          | 3.3          |
| <b>Total Length</b>               | 0.68                             | 0.57-0.76 | <0.0001 | 0.94                      | 2.1          | 1.1          |
| <b>Flagellum:Head ratio</b>       | 0.61                             | 0.48-0.70 | <0.0001 | 0.92                      | 4.5          | 3.0          |
| <b>Midpiece:Flagellum ratio</b>   | 0.55                             | 0.43-0.65 | <0.0001 | 0.90                      | 3.7          | 3.2          |

## References

- [27] Nakagawa S, Schielzeth H (2010) Repeatability for Gaussian and non-Gaussian data: a practical guide for biologists. *Biol Rev* 85: 935–956.
- [28] Calhim S, Immler S, Birkhead TR, Pizzari T (2007) Postcopulatory Sexual Selection Is Associated with Reduced Variation in Sperm Morphology. *PLoS ONE* 2: e413.
- [29] Immler S, Calhim S, Birkhead TR (2008) Increased postcopulatory sexual selection reduces the intramale variation in sperm design. *Evolution* 62: 1538–1543.
